# Supplementary material for: Contingency management for tobacco smoking during opioid addiction treatment: a randomised pilot study
Source: PubMed Central journal article supplement (PMC5589007; doi:10.1136/bmjopen-2017-017467), 2017-09-01
Supplement: bmjopen-2017-017467supp002.pdf [file bmjopen-2017-017467supp002.pdf]

Figure. Example template of recommended content for the schedule of enrolment, interventions, and assessments.\*

|                                     | Enrolment       |        | Post-allocation |        |        |        |        | Post study | Follow-up |
|-------------------------------------|-----------------|--------|-----------------|--------|--------|--------|--------|------------|-----------|
| TIMEPOINT**                         | -t <sub>1</sub> | Week 1 | Week 2          | Week 3 | Week 4 | Week 5 | Week 6 |            | 6 Months  |
| <b>ENROLMENT:</b>                   |                 |        |                 |        |        |        |        |            |           |
| Eligibility screen                  | X               |        |                 |        |        |        |        |            |           |
| Informed consent                    | X               |        |                 |        |        |        |        |            |           |
| <i>Demographics collection</i>      | X               |        |                 |        |        |        |        |            |           |
| Allocation to condition             |                 | X      |                 |        |        |        |        |            |           |
| <b>INTERVENTIONS:</b>               |                 |        |                 |        |        |        |        |            |           |
| <i>CM Smoking abstinence</i>        |                 |        | ←—————→         |        |        |        |        |            |           |
| <i>CM Clinic attendance</i>         |                 |        | ←—————→         |        |        |        |        |            |           |
| <b>ASSESSMENTS:</b>                 |                 |        |                 |        |        |        |        |            |           |
| Numbers completing treatment        |                 |        |                 |        |        |        | X      |            |           |
| <i>Demographics</i>                 | X               |        |                 |        |        |        |        |            |           |
| <i>Breath CO</i>                    |                 |        | ←—————→         |        |        |        |        |            | X         |
| <i>Point prevalence smoking</i>     |                 |        | ←—————→         |        |        |        |        |            | X         |
| <i>Opiate treatment information</i> |                 |        |                 |        |        |        |        | X          |           |
| <i>Illicit drug use</i>             |                 |        |                 |        |        |        |        | X          |           |

\*Recommended content can be displayed using various schematic formats. See SPIRIT 2013 Explanation and Elaboration for examples from protocols.

\*\*List specific timepoints in this row.
