# Supplementary material for: Contingency management for tobacco smoking during opioid addiction treatment: a randomised pilot study
Source: PubMed Central journal article supplement (PMC5589007; doi:10.1136/bmjopen-2017-017467), 2017-09-01
Supplement: bmjopen-2017-017467supp003.pdf [file bmjopen-2017-017467supp003.pdf]

## Appendix

### Appendix 1 Participant Information Sheet

Study title: Addition of contingency management to stop smoking services for in-treatment opiate addicts: a randomised controlled pilot study

#### Participant Information Sheet

V1 14/03/2016

IRAS ID: 171709

South London   
and Maudsley  
NHS Foundation Trust

#### Smoking Cessation Study

 Institute of  
Psychiatry, Psychology  
& Neuroscience

---

#### We invite you to take part in a research study

---

- Before deciding to take part in the study, it is important for you to understand why the research is being done and what taking part will involve
- Please take time to read the following information carefully and discuss it with friends and relatives if you wish
- You are free to decide whether or not to take part in this study. If you choose not to take part this will not affect the care that you receive at Lorraine Hewitt House or anywhere else
- If there is anything that is not clear or you would like more information, then please ask

---

#### Important things you need to know

---

- Tobacco smoking is very common amongst opiate and methadone users. This makes them likely to experience negative health effects.
- Stopping smoking is one of the best things you can do for your health. It can also reduce the discomfort resulting from opiate use treatment.
- Rewards are one way of helping people stop smoking. This is sometimes called contingency management.
- Contingency management has been shown to work well in changing lots of different behaviours. We want to see whether it could help opiate use patients to stop smoking.
- The aim of this study, is to see whether or not it would be possible to test this treatment in a larger trial
- If you take part in the study, you are free to withdraw from the study at any time, **without giving any reason**. If requested, any data that we have collected from you will be destroyed.
- We might ask you to fill out a small questionnaire if you do decide to withdraw from the study, to help us improve our interventions in the future. There is no obligation to complete this questionnaire though.

---

#### Requirements

---

In order to take part in the study you need to:

- Be in treatment for opiate addiction
- Smoke at least 10 cigarettes per day
- Be between 18 and 65 years old
- Must **NOT** be in treatment for any other drug addiction
- Must **NOT** be participating in any other research

## What will taking part involve?

- This study is for people who want to stop smoking, and will attend the stop smoking clinic at Lorraine Hewitt house.
- You will need to come to Lorraine Hewitt House **once a week** on a Monday, Wednesday or Friday to attend the smoking clinic. You will have to do this for a total of 6 weeks.
- At the first study visit you will be asked questions about your age and work history etc. You will also be asked to plan to quit smoking for the following week.
- Every time you come into the clinic, you will have to blow into a machine that measures chemicals in your breath. This is how we know if you have been smoking or not.
- You will be put into one of two groups at random (e.g. by coin toss). In one group you can earn rewards for attending the stop smoking clinic and not smoking. In the other group you can earn rewards just for attending the clinic.
- Rewards will be 'Love2Shop' vouchers
- The amount of money that you earn each time you meet the criteria for that group (attending the stop smoking clinic and not smoking in one, and just attending the stop smoking clinic in the other) will start at £5 and will double each time you meet the criteria up to £40. The diagram below shows how much you will earn if you meet the criteria for reward for the duration of the study

| SSS Week/Visit Number          |       |       |        |        |        |        |                |
|--------------------------------|-------|-------|--------|--------|--------|--------|----------------|
|                                | 1     | 2     | 3      | 4      | 5      | 6      |                |
| Intervention Week/Visit Number |       |       |        |        |        |        |                |
|                                | 1     | 2     | 3      | 4      | 5      | Total  |                |
| Reward Value                   | £0.00 | £5.00 | £10.00 | £20.00 | £40.00 | £40.00 | <b>£115.00</b> |

- If you don't meet the criteria though you won't get paid for that visit to the clinic, and the amount that you get paid for the next time you do will start again at £5, and will increase each time like before.

## Benefits of taking part

- You could earn up to £115 just by attending the stop smoking clinic and stopping smoking
- Taking part may help you to stop smoking for good. This will help improve your general health greatly
- By taking part, you will be helping us to better understand how we can help other people to stop smoking

---

## Possible disadvantages of taking part

---

- Giving up smoking can result in a number of withdrawal symptoms that may cause discomfort. The behavioural support and nicotine replacement therapy that you will receive as part of the normal smoking cessation clinic is designed to help this.

---

## Frequently asked questions and further information

---

- **What will happen if I don't want to carry on with the study?** If at any point during the study you decide that you no longer want to take part, you can withdraw without giving any reason. All you need to do is tell anyone at the clinic related with the study that this is the case, and you will immediately be withdrawn from the study. You can also request that all of the data collected from you be destroyed.
- **How will my information be kept confidential?** Any data stored about you will be anonymous, and will not contain any data that would allow you to be identified. All information recorded from you will be held on a secure computer system at King's College London, in an encrypted form that can only be accessed the research team involved with the study.
- **What will happen to the results of this study?** The results of this study will be used by the primary researcher Tom Ainscough as part of his doctoral thesis, will be written up as an academic paper to be published, and will help inform the design of future research.
- **What if I want to know the results of the study when it finishes?** If you want to be informed of the results of the study once it has finished, this information will be made freely available at Lorraine Hewitt House. Just ask at the reception.
- **Who is organising and funding this study?** The study is organised through the Institute of Psychology, Psychiatry and Neuroscience, King's College London and the South London and Maudsley NHS Trust, and is funded by the Medical Research Council (<http://www.mrc.ac.uk/>)
- **Who has reviewed this study?** The study design has been reviewed by both an NHS ethics committee and the Research and Development department of the Institute of Psychology, Psychiatry and Neuroscience, King's College London
- **Where can I find more information about research?** For more general information about research you can visit either <http://www.invo.org.uk/> or [www.testingtreatments.org](http://www.testingtreatments.org)
- **Who can I contact for more information about this study?** If you need any further information about the study, please contact Tom Ainscough by emailing [thomas.ainscough@kcl.ac.uk](mailto:thomas.ainscough@kcl.ac.uk) or calling 020 7848 5727

Appendix 2 Demographic and Smoking behaviour questionnaire

|                                     |                                                                                                                                                                                                                                                                                                                                                                                 |
|-------------------------------------|---------------------------------------------------------------------------------------------------------------------------------------------------------------------------------------------------------------------------------------------------------------------------------------------------------------------------------------------------------------------------------|
| <b>Basic Demographics</b>           |                                                                                                                                                                                                                                                                                                                                                                                 |
|                                     |                                                                                                                                                                                                                                                                                                                                                                                 |
| Participant ID                      |                                                                                                                                                                                                                                                                                                                                                                                 |
|                                     |                                                                                                                                                                                                                                                                                                                                                                                 |
| Gender                              | Male, Female, Not reported                                                                                                                                                                                                                                                                                                                                                      |
|                                     |                                                                                                                                                                                                                                                                                                                                                                                 |
| Pregnant                            | Yes, No, Not reported                                                                                                                                                                                                                                                                                                                                                           |
|                                     |                                                                                                                                                                                                                                                                                                                                                                                 |
| Breastfeeding                       | Yes, No, Not reported                                                                                                                                                                                                                                                                                                                                                           |
|                                     |                                                                                                                                                                                                                                                                                                                                                                                 |
| Eligible for free prescriptions?    | Yes, No, Not reported                                                                                                                                                                                                                                                                                                                                                           |
|                                     |                                                                                                                                                                                                                                                                                                                                                                                 |
| Ethnic Group                        | White British, White Irish, White Other, Mixed White & Black Caribbean, Mixed White & Black African, Mixed White & Asian, Mixed Other, Asia/Asian Brit – Indian, Asia/Asian Brit – Pakistani, Asia/Asian Brit – Bangladeshi, Asia/Asian Brit – Other, Black/Black Brit - Caribbean<br><br>Black/Black Brit – African, Black/Black Brit – Other, Chinese, Any other ethnic group |
|                                     |                                                                                                                                                                                                                                                                                                                                                                                 |
| Employment Status                   | Full time student, Never Worked/Unemployed for over 1 year, Retired, Sick/Disabled/Unable to return to work, Home carer (unpaid), Managerial/Professional, Intermediate occupation (e.g. clerical worker), Routine & Manual occupation (e.g. electrician) Other                                                                                                                 |
|                                     |                                                                                                                                                                                                                                                                                                                                                                                 |
| How did you hear about the service? | GP , Practice nurse, Pharmacist, Other Professional, NHS National smoking helpline, Internet, Family/Friends,                                                                                                                                                                                                                                                                   |

|  |                                                                                |
|--|--------------------------------------------------------------------------------|
|  | Previous user of the service, Newspaper or magazine, TV, Poster/leaflet, Other |
|--|--------------------------------------------------------------------------------|

|                                        |                            |                   |  |
|----------------------------------------|----------------------------|-------------------|--|
| <b>Quitting</b>                        |                            |                   |  |
|                                        |                            |                   |  |
| Quitting confidence                    | 1 (Not at all) – 10 (Very) |                   |  |
|                                        |                            |                   |  |
| Quitting importance                    | 1 (Not at all) – 10 (Very) |                   |  |
|                                        |                            |                   |  |
| Quitting Readiness                     | 1 (Not at all) – 10 (Very) |                   |  |
|                                        |                            |                   |  |
| Tried to stop smoking before?          | Yes / No                   | # Times:          |  |
|                                        |                            |                   |  |
| # weeks since last quit attempt        |                            |                   |  |
|                                        |                            |                   |  |
| Longest period of abstinence           |                            |                   |  |
|                                        |                            |                   |  |
| Have you tried NRT?                    | Yes / No                   | Types:            |  |
|                                        |                            | How long used for |  |
|                                        |                            |                   |  |
| Ever tried Zyban/Champix?              | Yes / No                   | How long used for |  |
|                                        |                            |                   |  |
| Have you used other stop smoking aids? | Yes / No                   | Please Specify    |  |

|                          |  |
|--------------------------|--|
| <b>Smoking Behaviour</b> |  |
|--------------------------|--|

|                                                                                                                 |                                                                                   |
|-----------------------------------------------------------------------------------------------------------------|-----------------------------------------------------------------------------------|
|                                                                                                                 |                                                                                   |
| What type of tobacco do you smoke?                                                                              | Cigarettes, Roll-ups, Cigars, Oral                                                |
|                                                                                                                 |                                                                                   |
| How many cig. Do you smoke per day?<br>(if hand rolled, how many ounces per week - 0.5 oz is 12.5g, or 20 cigs) |                                                                                   |
|                                                                                                                 |                                                                                   |
| How soon after waking do you have your first cig.?                                                              | Less than 5 mins, 5-15 mins, 15-30 mins, 30-60 mins, 1-2 hours, More than 2 hours |
|                                                                                                                 |                                                                                   |
| How many years have you smoked?                                                                                 |                                                                                   |
|                                                                                                                 |                                                                                   |
| Age started smoking                                                                                             |                                                                                   |
|                                                                                                                 |                                                                                   |
| Live with a smoker?                                                                                             |                                                                                   |

|                            |   |
|----------------------------|---|
| <b>Contact information</b> |   |
|                            |   |
| Mobile Phone               |   |
| Landline Number            |   |
| Email                      | - |
| Friend's contact details   | - |

Study title: Addition of contingency management to stop smoking services for in-treatment opiate addicts: a randomised controlled pilot study

South London and Maudsley  
NHS Foundation Trust

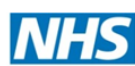

KING'S  
College  
LONDON

Institute of  
Psychiatry, Psychology  
& Neuroscience

## Smoking Study Questionnaire

Participant ID:

Date:

**Please circle the ONE response you feel most appropriate:**

|   |                                                                                                                                    |     |    |        |
|---|------------------------------------------------------------------------------------------------------------------------------------|-----|----|--------|
| 1 | Would you recommend this service to other smokers who want to stop smoking?                                                        | Yes | No | Unsure |
| 2 | In the event that you started smoking again would you go back to the service for help with stopping smoking?                       | Yes | No | Unsure |
| 3 | If you returned to the service for help with stopping smoking in the future do you think that you would be welcomed back?          | Yes | No | Unsure |
| 4 | When you contacted the service were you given an appointment date or told how long you would have to wait?                         | Yes | No | Unsure |
| 5 | Was the length of time you had to wait for your first appointment acceptable to you?                                               | Yes | No | Unsure |
| 6 | Are the appointment times you were given convenient for you?                                                                       | Yes | No | Unsure |
| 7 | Is the place where you go for your appointments convenient for you to get to?                                                      | Yes | No | Unsure |
| 8 | Was the information that you were given about the choice of medication helpful?                                                    | Yes | No | Unsure |
| 9 | Was it easy to get hold of your medicine once you had chosen which medication you were going to use for your stop smoking attempt? | Yes | No | Unsure |

**Please circle the ONE response you feel most appropriate:**

|    |                                                                                           |             |        |           |                |                |
|----|-------------------------------------------------------------------------------------------|-------------|--------|-----------|----------------|----------------|
| 10 | <b>Overall, how satisfied are you with the support you have received to stop smoking?</b> |             |        |           |                |                |
|    | Very Unsatisfied                                                                          | Unsatisfied | Unsure | Satisfied | Very Satisfied | Not Applicable |

|    |                                                                   |             |        |           |                |                |
|----|-------------------------------------------------------------------|-------------|--------|-----------|----------------|----------------|
| 11 | <b>How satisfied are you with how supportive staff have been?</b> |             |        |           |                |                |
|    | Very Unsatisfied                                                  | Unsatisfied | Unsure | Satisfied | Very Satisfied | Not Applicable |

|    |                                                                                                              |           |        |         |              |                |
|----|--------------------------------------------------------------------------------------------------------------|-----------|--------|---------|--------------|----------------|
| 12 | <b>How helpful has the information and advice that staff have given to you during your appointment been?</b> |           |        |         |              |                |
|    | Very Unhelpful                                                                                               | Unhelpful | Unsure | Helpful | Very Helpful | Not Applicable |

|    |                                                                                   |           |        |         |              |                |
|----|-----------------------------------------------------------------------------------|-----------|--------|---------|--------------|----------------|
| 13 | <b>How helpful has the written information that staff have given to you been?</b> |           |        |         |              |                |
|    | Very Unhelpful                                                                    | Unhelpful | Unsure | Helpful | Very Helpful | Not Applicable |

|    |                                                                                          |           |        |         |              |                |
|----|------------------------------------------------------------------------------------------|-----------|--------|---------|--------------|----------------|
| 14 | <b>Do you find having your carbon monoxide (CO) reading done at every visit helpful?</b> |           |        |         |              |                |
|    | Very Unhelpful                                                                           | Unhelpful | Unsure | Helpful | Very Helpful | Not Applicable |

**Please tick ALL appropriate responses:**

|                  |                                                                                                                         |                   |           |             |             |             |
|------------------|-------------------------------------------------------------------------------------------------------------------------|-------------------|-----------|-------------|-------------|-------------|
| 15               | <b>Which of the following types of nicotine replacement therapy did you receive?<br/>(Please circle ALL that apply)</b> |                   |           |             |             |             |
| Nicotine patches | Nicotine gum                                                                                                            | Nicotine lozenges | Inhalator | Mouth spray | Nasal spray | Oral Strips |

|                  |                                                                                                                                  |                   |           |             |             |             |
|------------------|----------------------------------------------------------------------------------------------------------------------------------|-------------------|-----------|-------------|-------------|-------------|
| 16               | <b>Which of the following types of nicotine replacement therapy did you find most useful?<br/>(Please circle ALL that apply)</b> |                   |           |             |             |             |
| Nicotine patches | Nicotine gum                                                                                                                     | Nicotine lozenges | Inhalator | Mouth spray | Nasal spray | Oral Strips |

|    |                                                                                             |    |  |  |  |  |
|----|---------------------------------------------------------------------------------------------|----|--|--|--|--|
| 17 | <b>Did you receive any vouchers during the intervention? If No please go to question 19</b> |    |  |  |  |  |
|    | Yes                                                                                         | No |  |  |  |  |



|    |                                                                   |           |        |         |              |                |
|----|-------------------------------------------------------------------|-----------|--------|---------|--------------|----------------|
| 18 | <b>If yes, how helpful were the vouchers in stopping smoking?</b> |           |        |         |              |                |
|    | Very Unhelpful                                                    | Unhelpful | Unsure | Helpful | Very Helpful | Not Applicable |

|    |                                                                                      |    |
|----|--------------------------------------------------------------------------------------|----|
| 19 | <b>Would you have tried to quit smoking if there were no vouchers being offered?</b> |    |
|    | Yes                                                                                  | No |

|    |                                                                                       |    |
|----|---------------------------------------------------------------------------------------|----|
| 20 | <b>Did you receive e-cigarettes during the study? If No, please go to question 22</b> |    |
|    | Yes                                                                                   | No |

|    |                                                                    |           |        |         |              |                |
|----|--------------------------------------------------------------------|-----------|--------|---------|--------------|----------------|
| 21 | <b>If yes, how helpful were e-cigarettes for stopping smoking?</b> |           |        |         |              |                |
|    | Very Unhelpful                                                     | Unhelpful | Unsure | Helpful | Very Helpful | Not Applicable |

|    |                                                                                                       |                   |      |                     |
|----|-------------------------------------------------------------------------------------------------------|-------------------|------|---------------------|
| 22 | <b>If you were to do the study again, what would be more likely to make you take part if you got:</b> |                   |      |                     |
|    | Vouchers                                                                                              | Free E-cigarettes | Both | Other (please say): |
|    |                                                                                                       |                   |      |                     |

|    |                                                                      |                       |                     |                        |
|----|----------------------------------------------------------------------|-----------------------|---------------------|------------------------|
| 23 | <b>Have you smoked since your last appointment with the service?</b> |                       |                     |                        |
|    | No, not a single puff                                                | Yes, just a few puffs | Yes, 1-5 cigarettes | More Than 5 Cigarettes |
